# Supplementary material for: Historical (1700–2012) global multi-model estimates of the fire emissions from the Fire Modeling Intercomparison Project (FireMIP)
Source: Copernicus journal article supplement (doi:10.5194/acp-19-12545-2019), 2019-10-09
Supplement: Supplementary file 1 [file acp-19-12545-2019-supplement.pdf]

Supplement of Atmos. Chem. Phys., 19, 12545–12567, 2019  
<https://doi.org/10.5194/acp-19-12545-2019-supplement>  
© Author(s) 2019. This work is distributed under  
the Creative Commons Attribution 4.0 License.

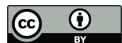

*Supplement of*

## **Historical (1700–2012) global multi-model estimates of the fire emissions from the Fire Modeling Intercomparison Project (FireMIP)**

**Fang Li et al.**

*Correspondence to:* Fang Li (lifang@mail.iap.ac.cn)

The copyright of individual parts of the supplement might differ from the CC BY 4.0 License.

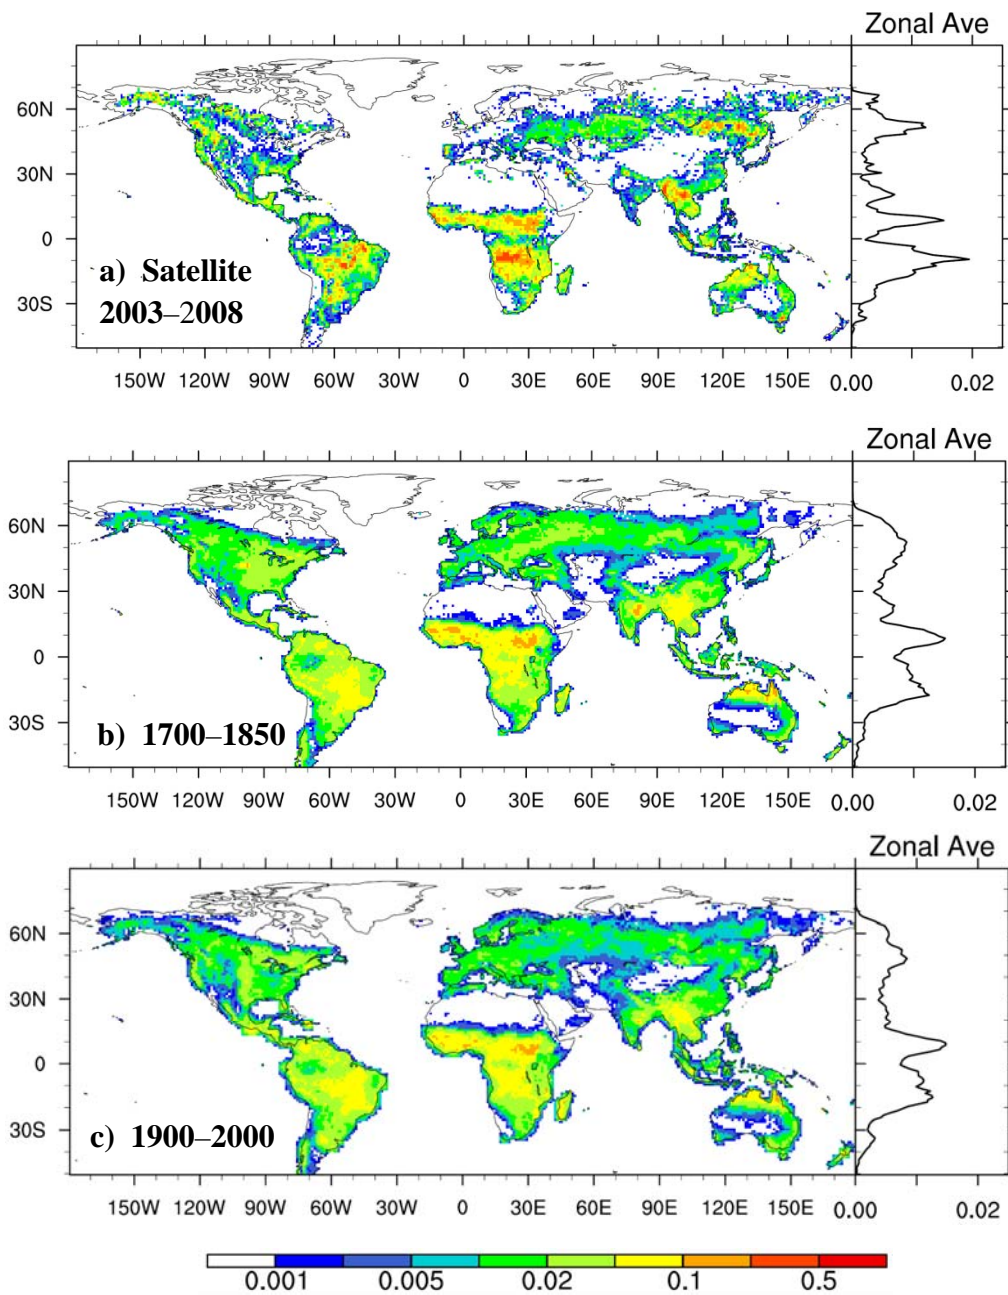

**Figure S1.** Standard deviations of time-averaged annual fire BC emissions ( $\text{g BC m}^{-2} \text{ yr}^{-1}$ ) and the zonal averages among a) satellite-based estimates for 2003–2008 and FireMIP model simulations for b) 1700–1850 and c) 1900–2000.

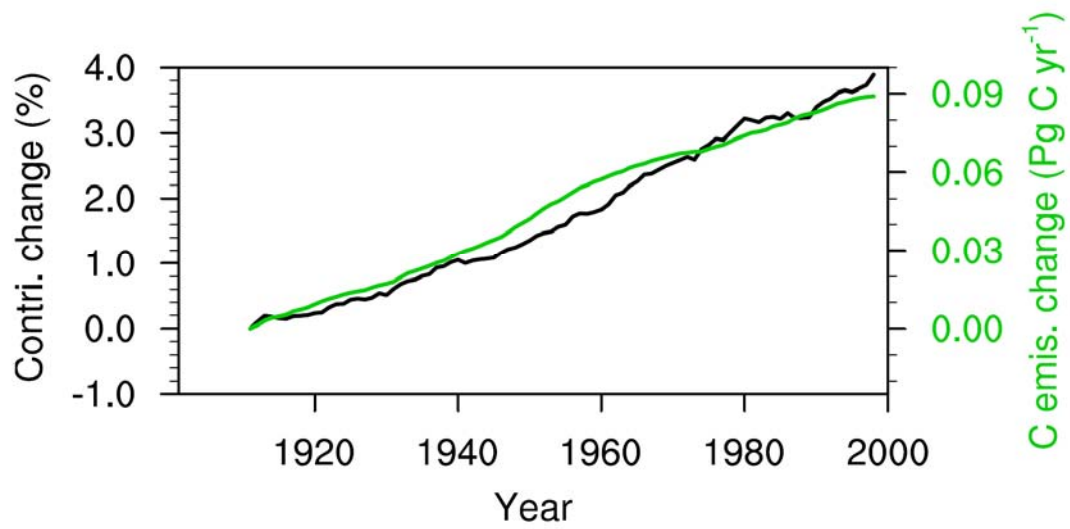

**Figure S2.** Changes in global annual carbon emissions of crop fires (green) and contribution of emissions from crop fires to total emissions (black) in the 20th century.

A 21-year running mean is used.

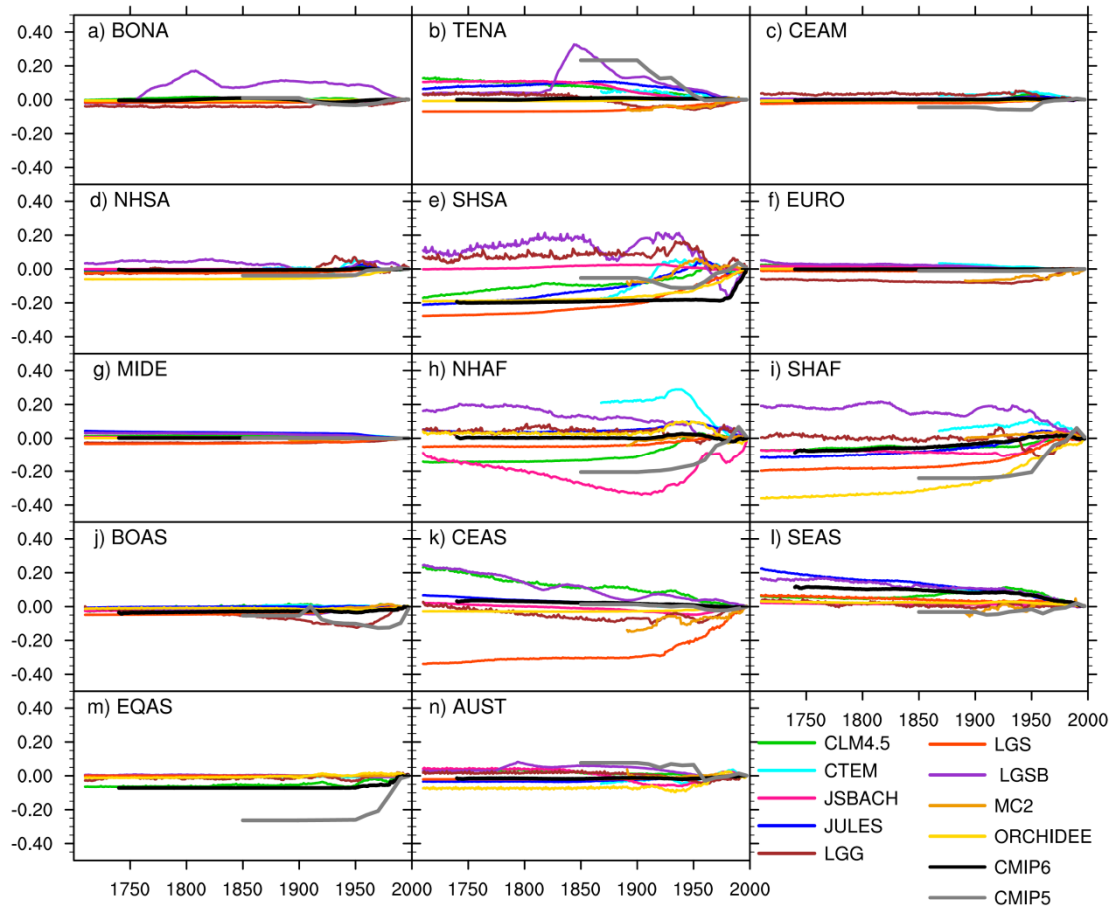

**Figure S3.** Long-term changes of annual regional fire BC emissions ( $\text{Tg BC yr}^{-1}$ ) from FireMIP models and CMIPs. A 21-year running mean is used.

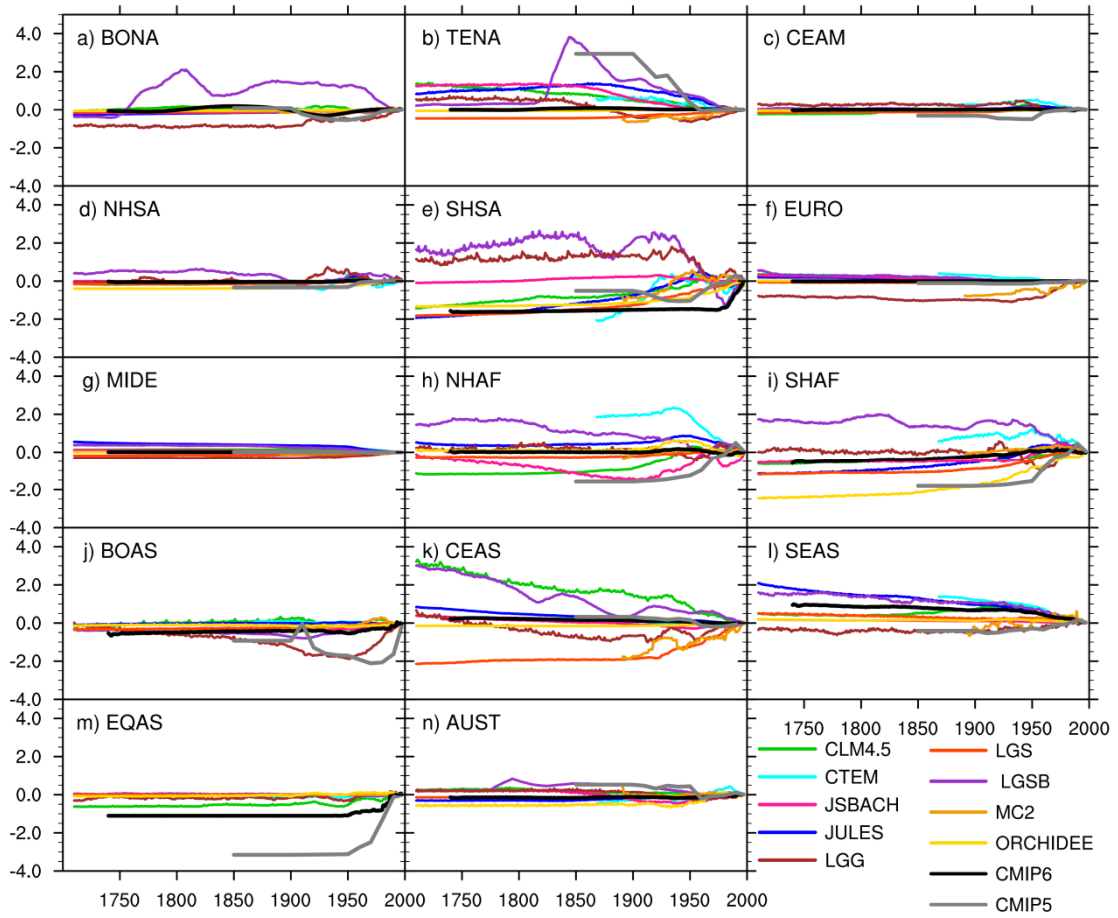

**Figure S4.** Same as Fig. S3, but for fire OC emissions (Tg OC yr<sup>-1</sup>).

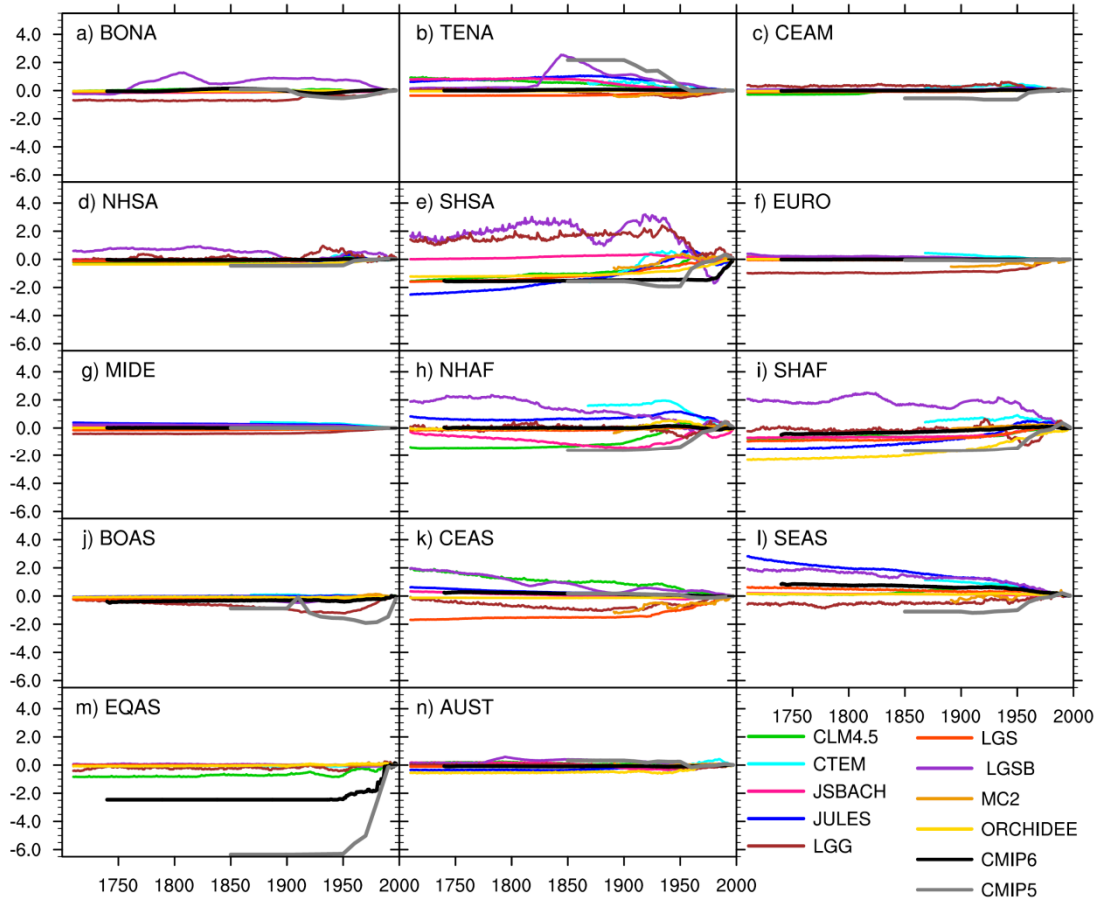

**Figure S5.** Same as Fig. S3, but for fire CH<sub>4</sub> emissions (Tg CH<sub>4</sub> yr<sup>-1</sup>).

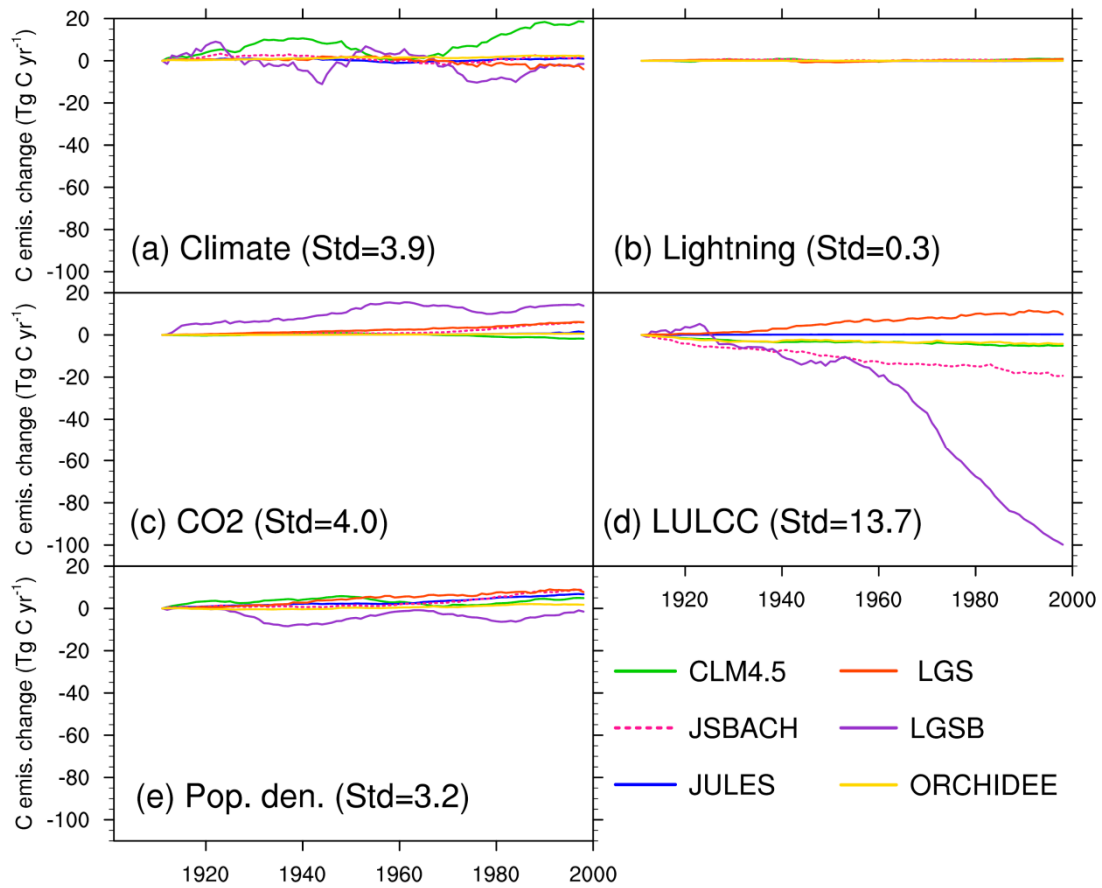

**Figure S6.** Change in annual BONA (Boreal North America) fire carbon emissions (Tg C yr<sup>-1</sup>; Tg=10<sup>12</sup>g) in the 20<sup>th</sup> century due to changes in (a) climate, (b) lightning frequency, (c) atmospheric CO<sub>2</sub> concentration, (d) land use and land cover change (LULCC), and (e) population density (control run – sensitivity run). A 21-year running mean is used. The standard deviation (Std) of multi-model simulated long-term changes averaged over the 20<sup>th</sup> century is also given in the bracket.

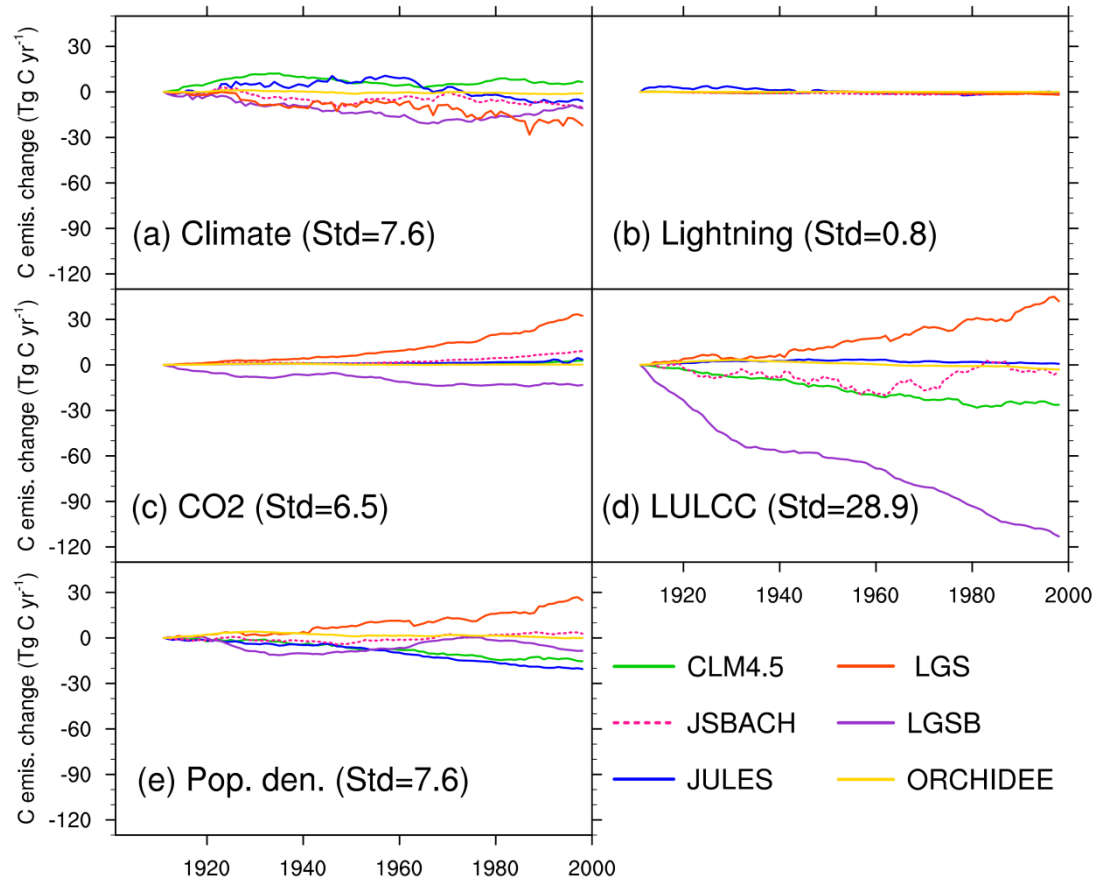

**Figure S7.** Same as Fig. S6, but for TENA (Temperate North America).



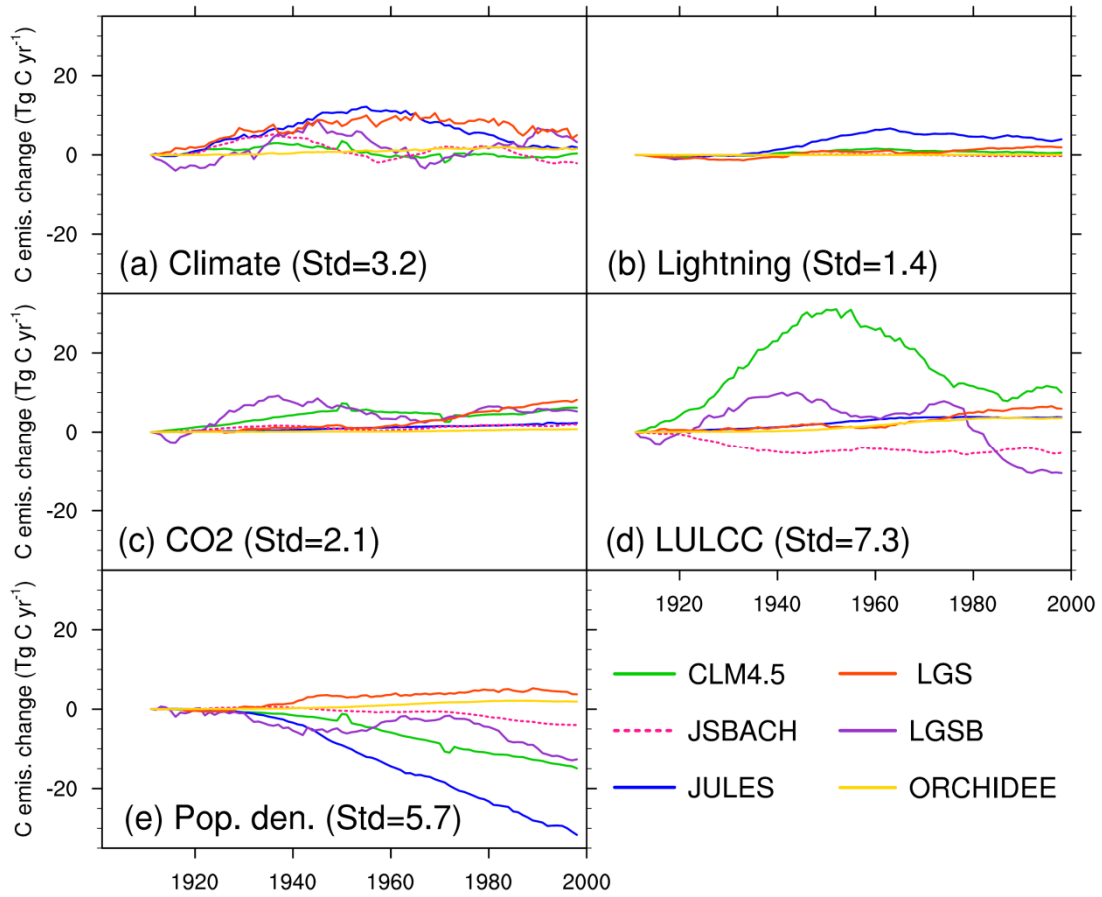

**Figure S8.** Same as Fig. S6, but for CEAM (Central America).

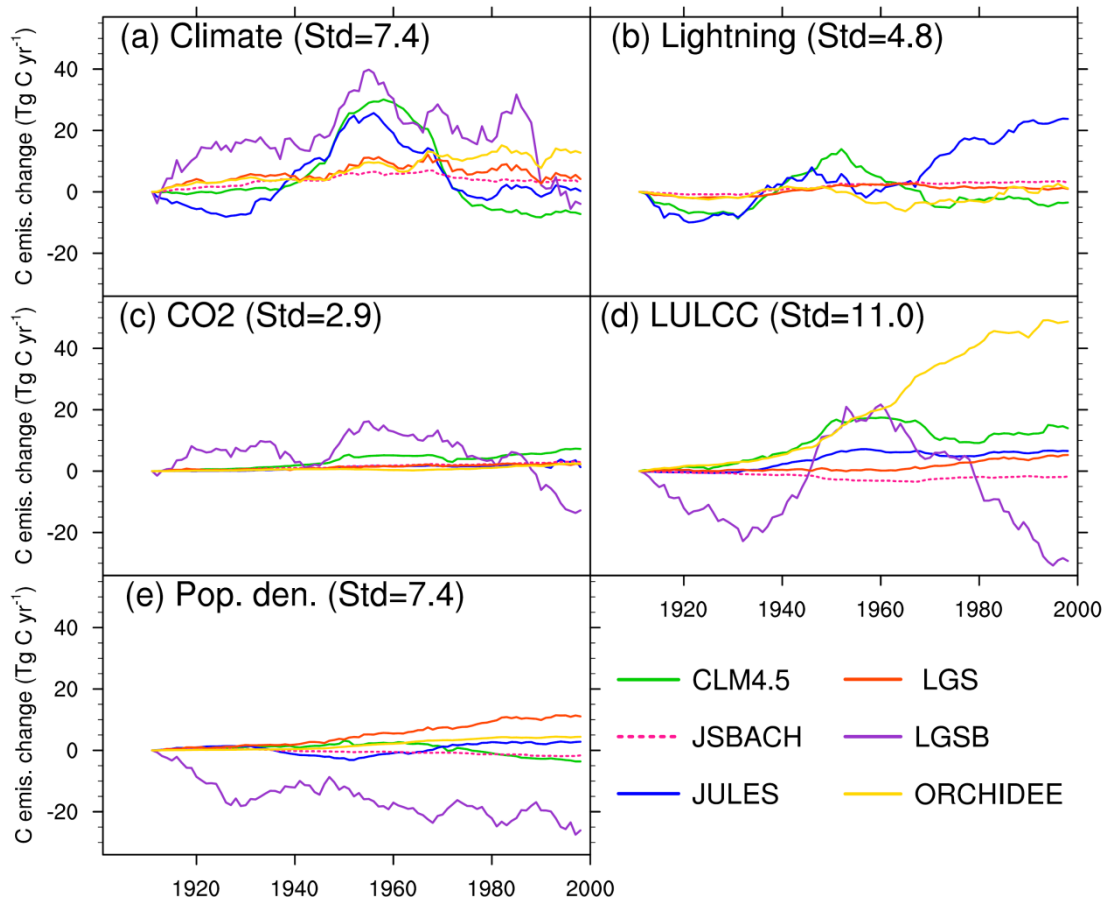

**Figure S9.** Same as Fig. S6, but for NHSA (Northern Hemisphere South America)

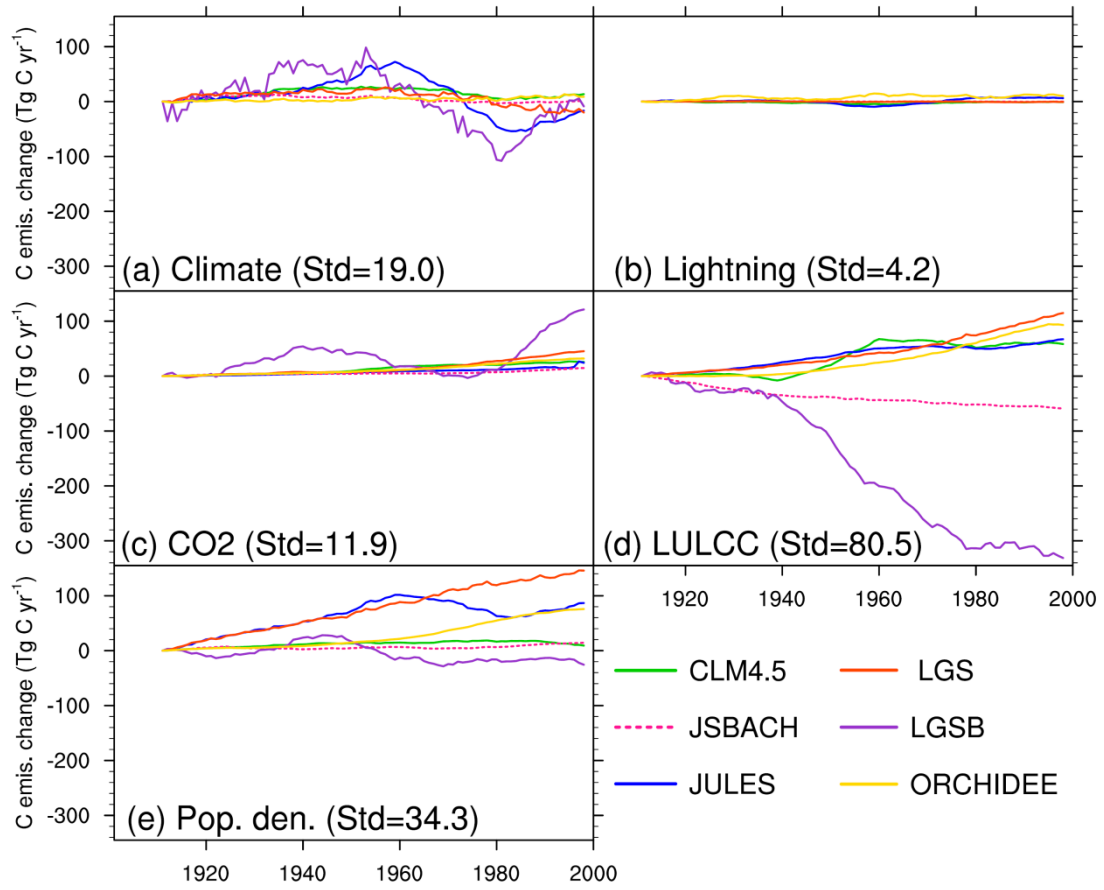

**Figure S10.** Same as Fig. S6, but for SHSA (Southern Hemisphere South America)

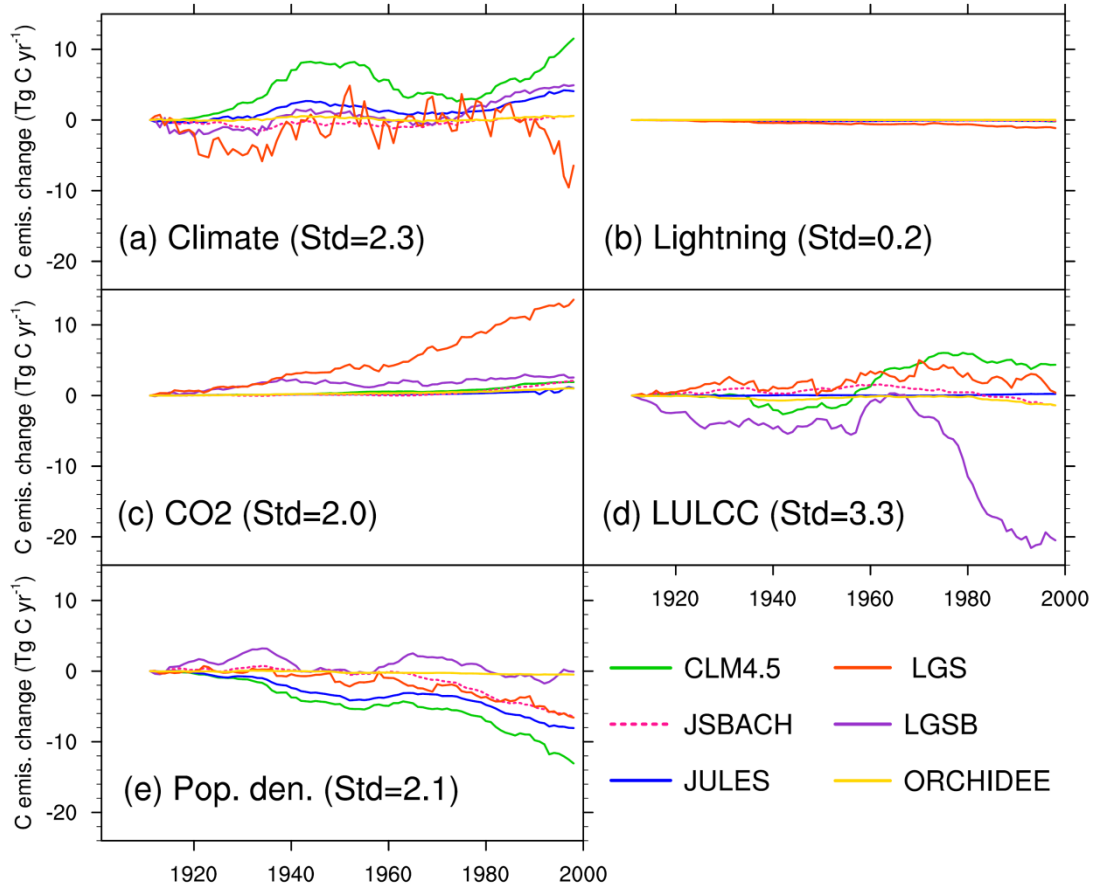

**Figure S11.** Same as Fig. S6, but for EURO (Europe).

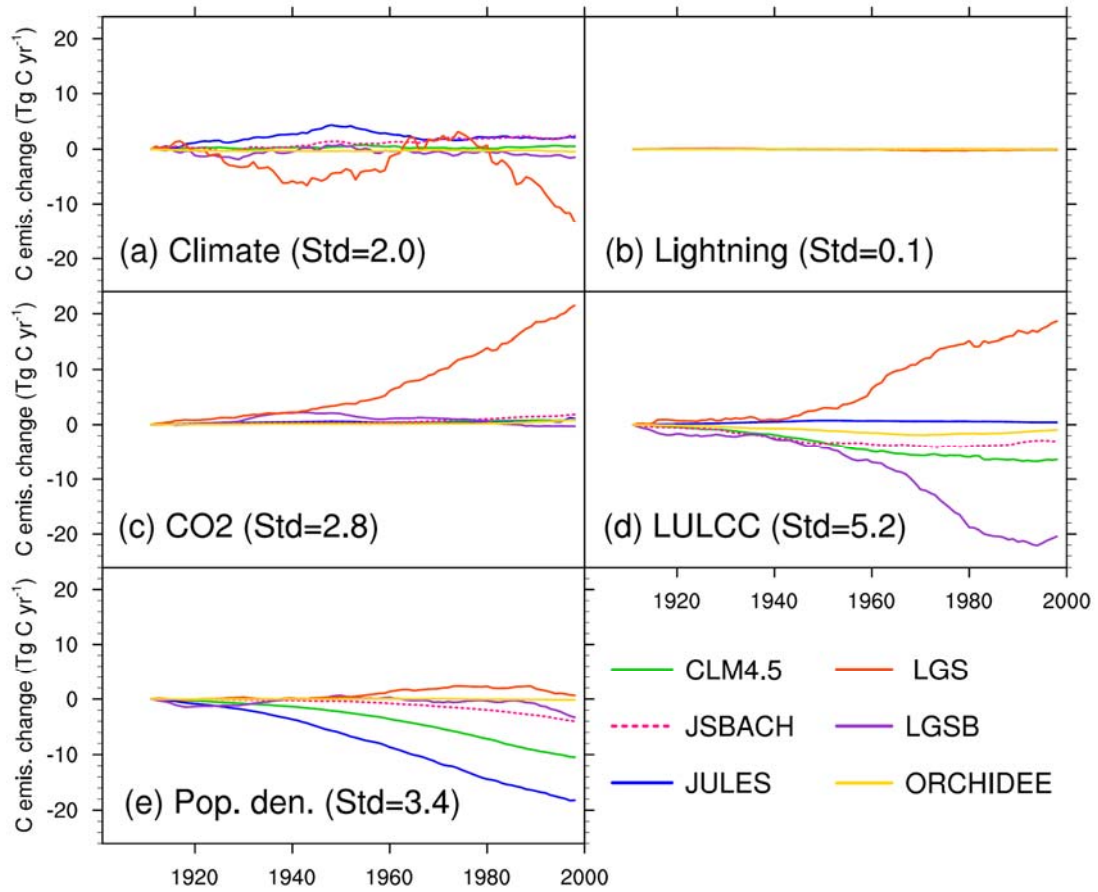

**Figure S12.** Same as Fig. S6, but for MIDE (Middle East).

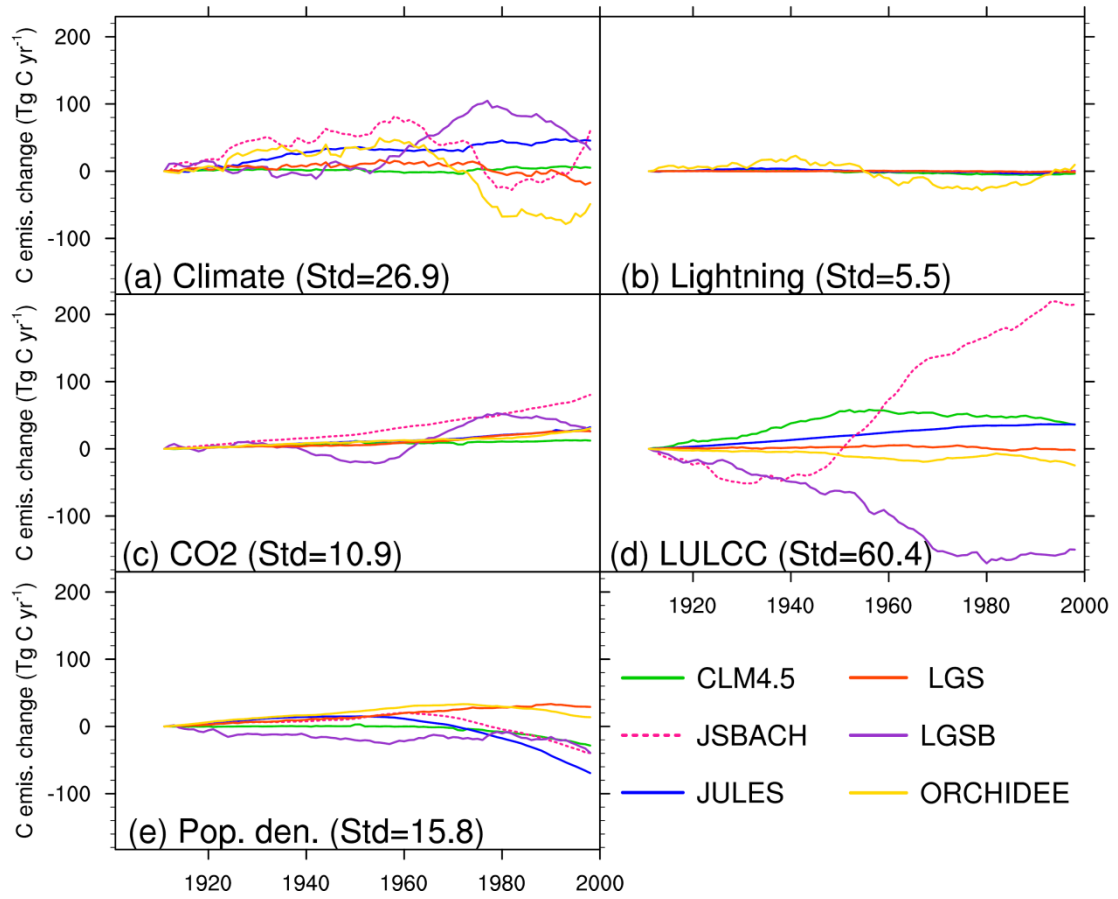

**Figure S13.** Same as Fig. S6, but for NHAF (Northern Hemisphere Africa).

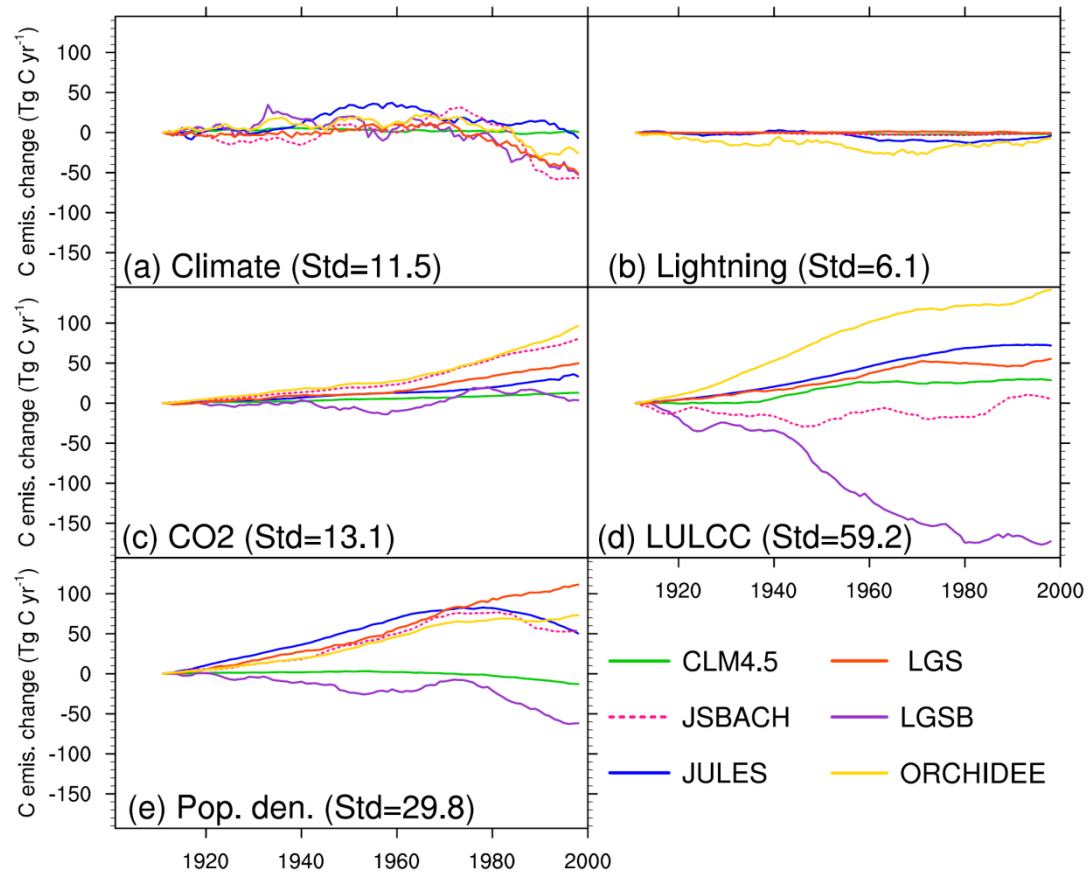

**Figure S14.** Same as Fig. S6, but for SHAF (Southern Hemisphere Africa).

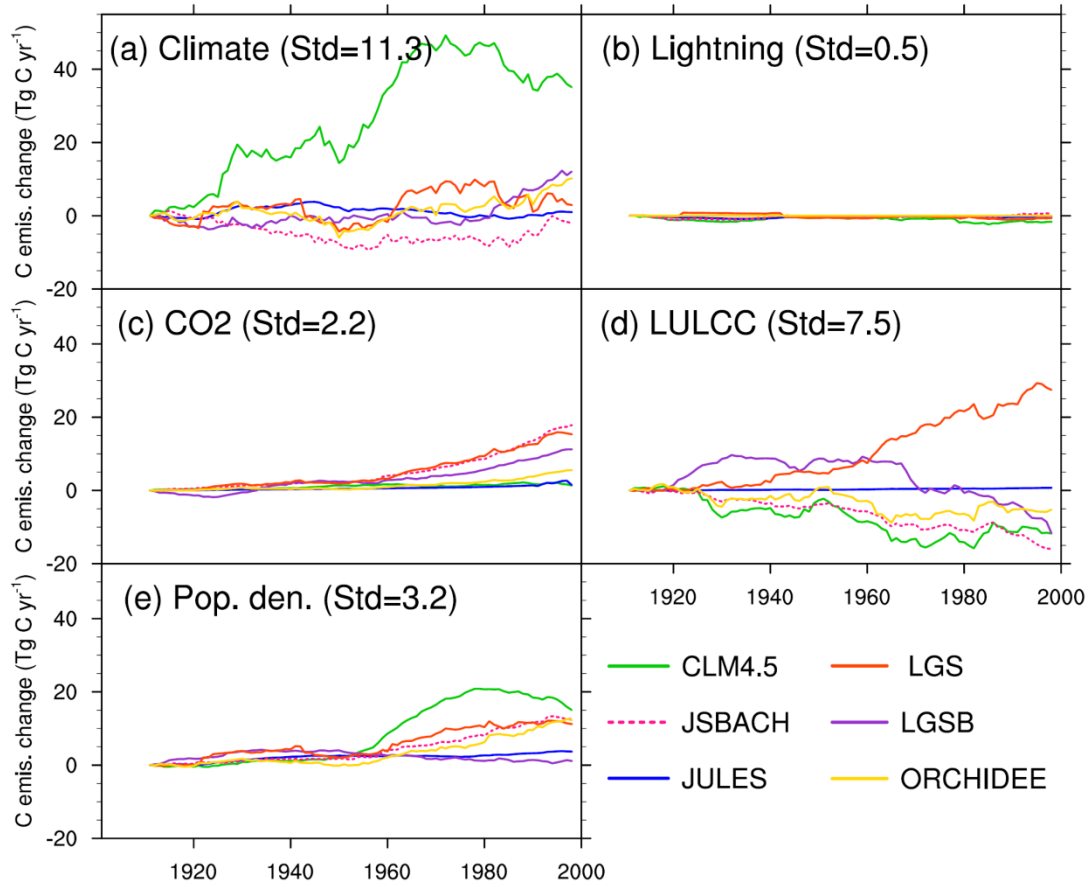

**Figure S15.** Same as Fig. S6, but for BOAS (Boreal Asia).



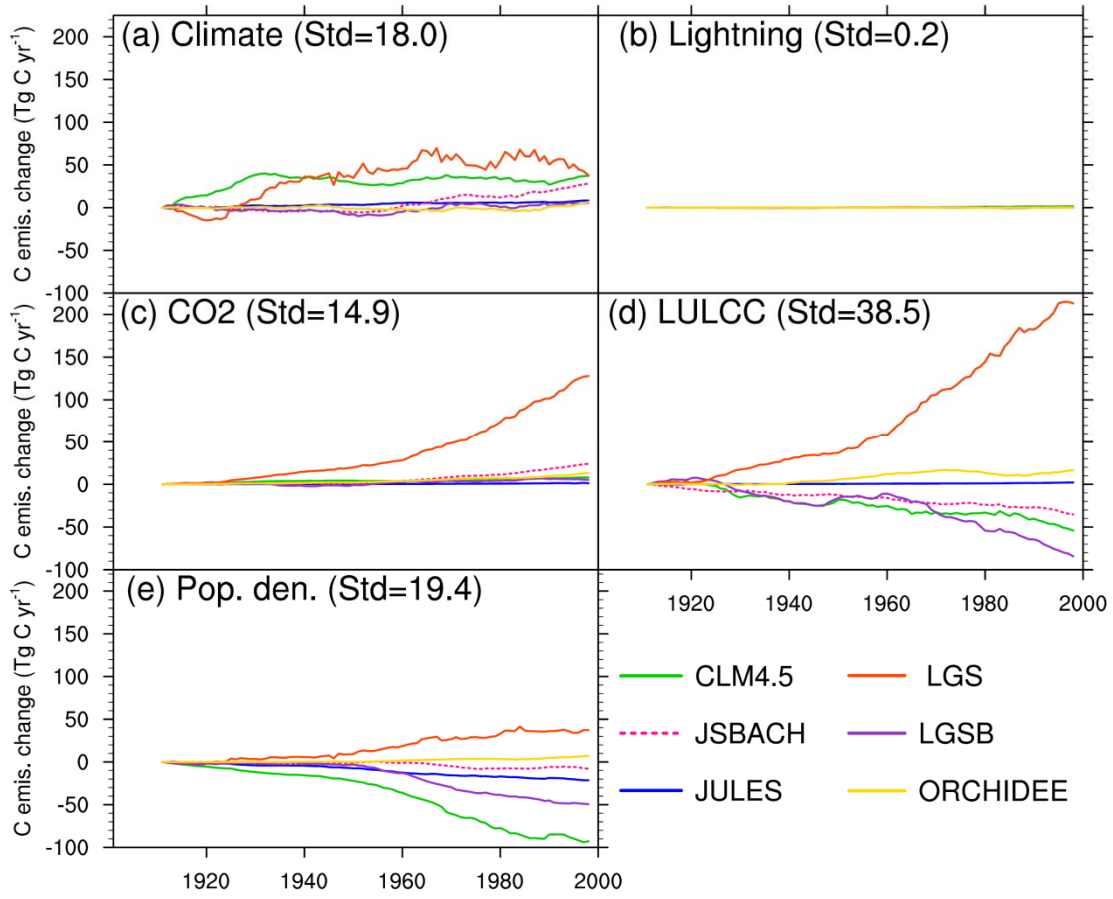

**Figure S16.** Same as Fig. S6, but for CEAS (Central Asia).

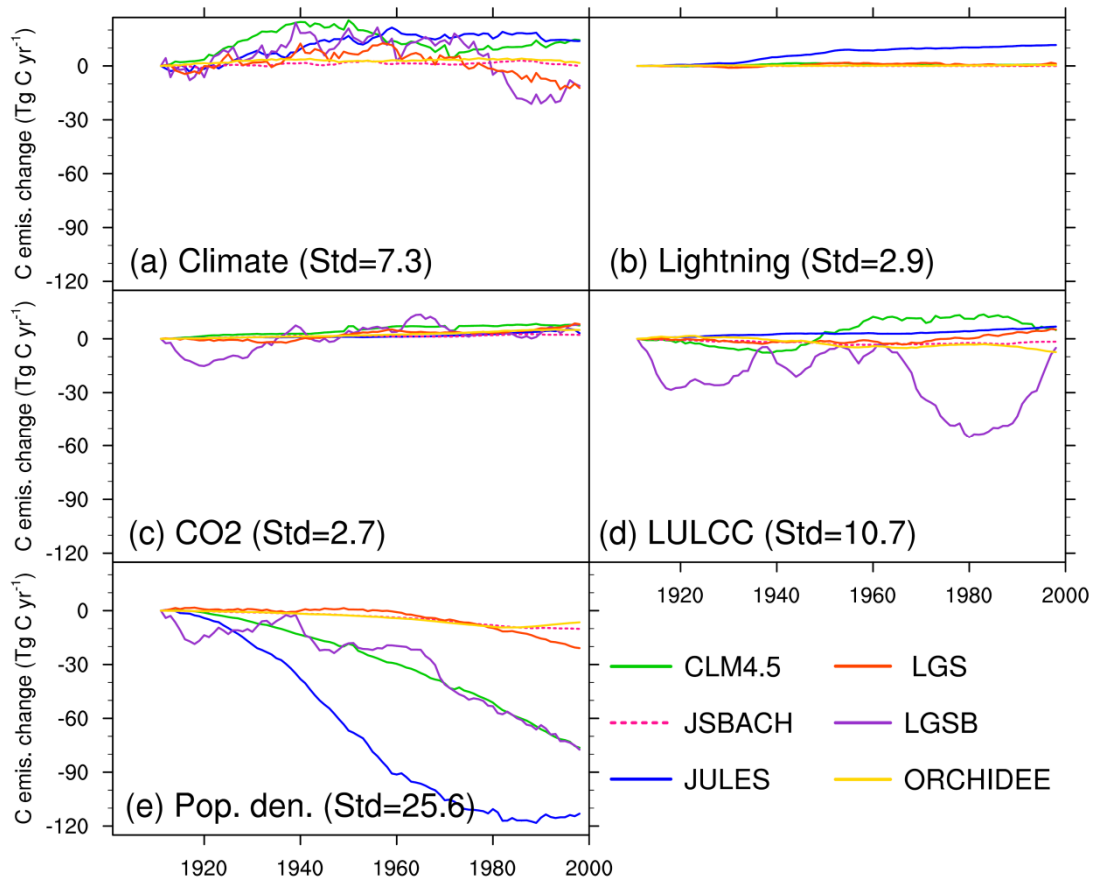

**Figure S17.** Same as Fig. S6, but for SEAS (South East Asia).

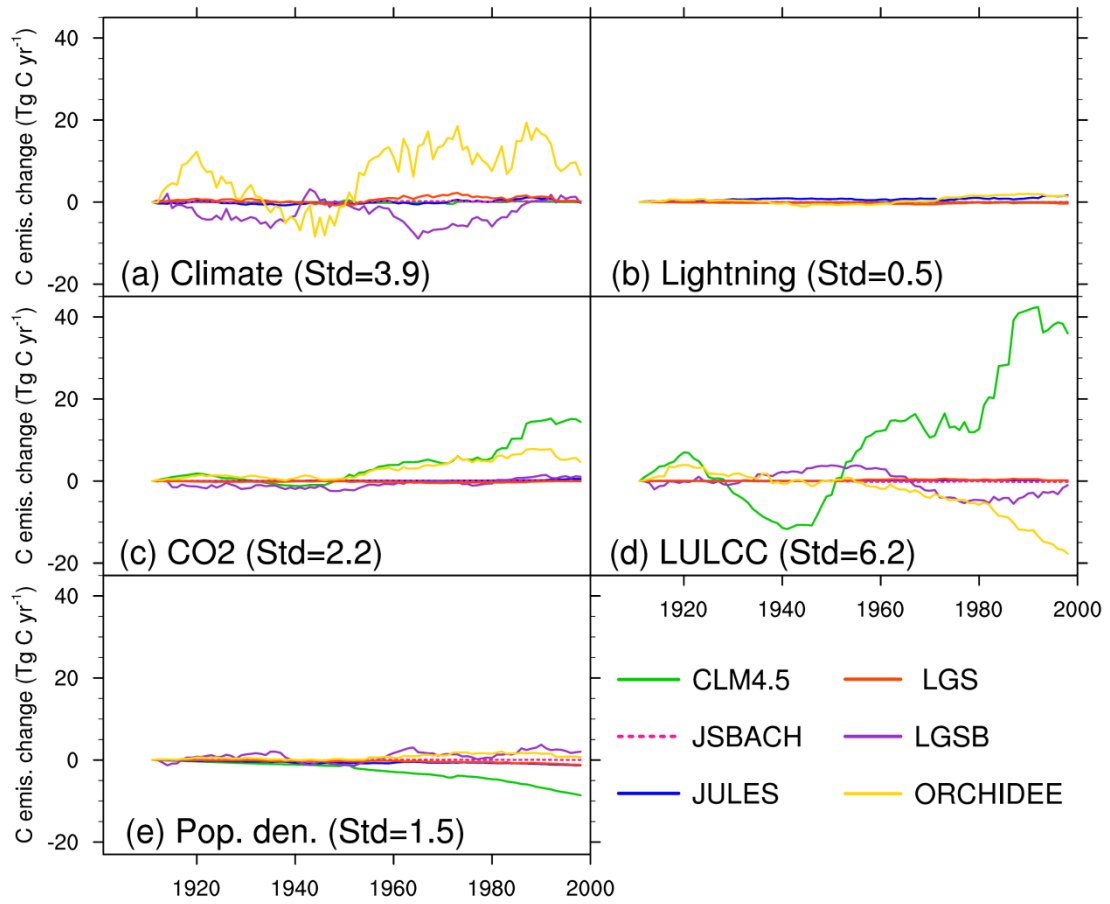

**Figure S18.** Same as Fig. S6, but for EQAS (Equatorial Asia).

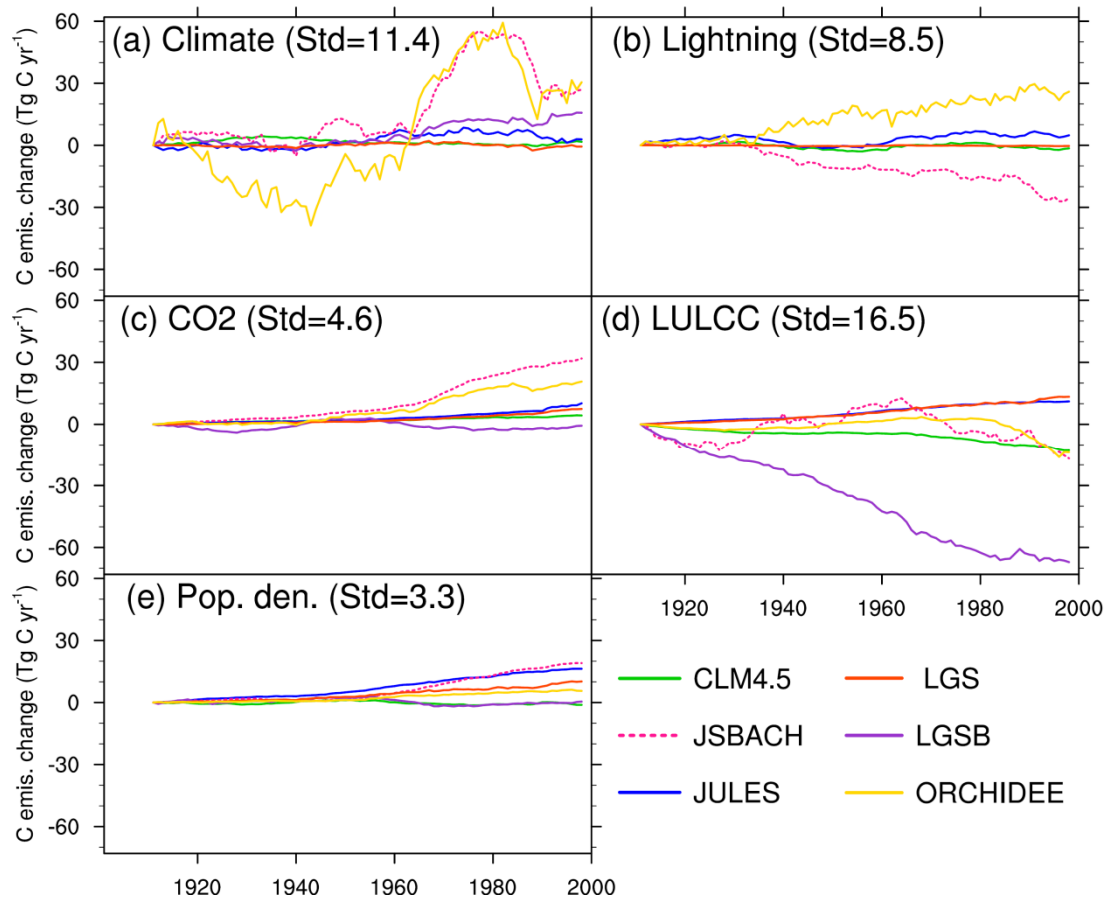

**Figure S19.** Same as Fig. S6, but for AUST (Australia).
